# Supplementary material for: A fitness cost resulting from Hamiltonella defensa infection is associated with altered probing and feeding behaviour in Rhopalosiphum padi
Source: Oxford University Press journal article supplement (doi:10.1242/jeb.207936), 2019-01-01
Supplement: jeb207936supp.pdf [file jeb207936supp.pdf]

**Table S1:** Aphid feeding and probing parameters (mean value  $\pm$  standard error) that were significantly affected by the different plant types (Hsp5 and Concerto). Numbers in parenthesis indicate the total number of individuals which displayed each parameter, the total number of individuals tested is indicated at the top of the column.

| Description of Response Variable Assessed (transformation used)              | Host plant                     |                               | Statistical results for each Explanatory Variable |                  |                |             |                             |             |
|------------------------------------------------------------------------------|--------------------------------|-------------------------------|---------------------------------------------------|------------------|----------------|-------------|-----------------------------|-------------|
|                                                                              | Concerto<br>( <i>max</i> = 24) | Hsp5<br>( <i>max</i> = 25)    | Plant                                             |                  | Endosymbiont   |             | Plant $\times$ Endosymbiont |             |
| Minimum recorded time to E1 (salivation into phloem) from first probe (sqrt) | 1286.76 s $\pm$ 287.82 s (24)  | 3546.65 s $\pm$ 572.45 s (23) | $X^2_1 = 16.69$                                   | $P = <0.001$ *** | $X^2_1 = 0.09$ | $P = 0.757$ | $X^2_1 = 0.14$              | $P = 0.699$ |
| Mean time to first E1 phase from first probe into plant tissue (sqrt)        | 3986.44 $\pm$ 527.44 s (24)    | 8992.00 $\pm$ 1257.19 s (23)  | $X^2_1 = 13.59$                                   | $P = <0.001$ *** | $X^2_1 = 0.01$ | $P = 0.945$ | $X^2_1 = 2.22$              | $P = 0.135$ |
| Number of E1 phases (sqrt)                                                   | 4.79 $\pm$ 0.60 (24)           | 3.28 $\pm$ 0.56 (23)          | $X^2_1 = 4.28$                                    | $P = 0.030$ *    | $X^2_1 = 0.01$ | $P = 0.946$ | $X^2_1 = 0.22$              | $P = 0.635$ |
| Mean time from first probe into plant tissue until first E2 phase (sqrt)     | 5490.25 $\pm$ 917.45 s (24)    | 10773.24 $\pm$ 1286.41 s (22) | $X^2_1 = 12.70$                                   | $P = <0.001$ *** | $X^2_1 = 0.33$ | $P = 0.565$ | $X^2_1 = 2.41$              | $P = 0.119$ |
| Number of E2 phases (sqrt)                                                   | 2.33 $\pm$ 0.24 (24)           | 1.52 $\pm$ 0.23 (22)          | $X^2_1 = 6.76$                                    | $P = 0.009$ *    | $X^2_1 = 0.01$ | $P = 0.975$ | $X^2_1 = 0.01$              | $P = 0.930$ |
| Total number of E phases (including E1, E2, and sE2) (sqrt)                  | 4.75 $\pm$ 0.61 (24)           | 3.20 $\pm$ 0.54 (23)          | $X^2_1 = 4.38$                                    | $P = 0.036$ *    | $X^2_1 = 0.01$ | $P = 0.993$ | $X^2_1 = 0.18$              | $P = 0.666$ |
| Number of sE2 phases (sqrt)                                                  | 1.20 $\pm$ 0.14 (21)           | 0.80 $\pm$ 0.15 (16)          | $X^2_1 = 4.13$                                    | $P = 0.042$ *    | $X^2_1 = 2.25$ | $P = 0.133$ | $X^2_1 = 2.80$              | $P = 0.094$ |

Level of statistical significance: \*  $<0.05$ , \*\*  $<0.01$ , \*\*\*  $<0.001$

**Table S2:** Aphid feeding and probing parameters which were not significantly affected by any treatment factors.

| Description of Response Variable Assessed<br>(transformation used)                                    | Statistical results for each Explanatory Variable |             |                 |             |                      |             |
|-------------------------------------------------------------------------------------------------------|---------------------------------------------------|-------------|-----------------|-------------|----------------------|-------------|
|                                                                                                       | Plant                                             |             | Endosymbiont    |             | Plant x Endosymbiont |             |
| Mean duration of each non-probing period (sqrt)                                                       | $X^2_1 = 0.11$                                    | $P = 0.732$ | $X^2_1 = 1.19$  | $P = 0.274$ | $X^2_1 = 1.19$       | $P = 0.273$ |
| Duration of the second probe into plant tissue (log)                                                  | $X^2_1 = 0.01$                                    | $P = 0.999$ | $X^2_1 = 0.01$  | $P = 0.935$ | $X^2_1 = 0.555$      | $P = 0.456$ |
| Number of stylet probes into plant tissue in the first hour (not transformed)                         | $X^2_1 = 0.09$                                    | $p = 0.758$ | $X^2_1 = 0.63$  | $p = 0.424$ | $X^2_1 = 2.32$       | $p = 0.127$ |
| Number of stylet probes into plant tissue in the third hour (not transformed)                         | $X^2_1 = 0.50$                                    | $p = 0.477$ | $X^2_1 = 0.01$  | $p = 0.993$ | $X^2_1 = 2.81$       | $p = 0.093$ |
| Number of stylet probes into plant tissue in the fourth hour (not transformed)                        | $X^2_1 = 2.49$                                    | $p = 0.114$ | $X^2_1 = 1.05$  | $p = 0.304$ | $X^2_1 = 0.01$       | $p = 0.971$ |
| Number of stylet probes into plant tissue in the fifth hour (not transformed)                         | $X^2_1 = 2.25$                                    | $p = 0.132$ | $X^2_1 = 0.82$  | $p = 0.365$ | $X^2_1 = 0.01$       | $p = 0.898$ |
| Number of stylet probes into plant tissue in the sixth hour (not transformed)                         | $X^2_1 = 0.15$                                    | $p = 0.694$ | $X^2_1 = 1.77$  | $p = 0.182$ | $X^2_1 = 0.146$      | $p = 0.226$ |
| Number of brief probes into plant tissue (< 3 mins) following first phloem contact (not transformed). | $X^2_1 = 0.80$                                    | $p = 0.368$ | $X^2_1 = 0.52$  | $p = 0.466$ | $X^2_1 = 2.09$       | $p = 0.147$ |
| Total duration of all C (mesophyll pathway) phases (not transformed)                                  | $X^2_1 = 0.49$                                    | $P = 0.482$ | $X^2_1 = 0.77$  | $P = 0.379$ | $X^2_1 = 1.20$       | $P = 0.277$ |
| Mean number of pd: potential drop (intracellular punctures) per probe into plant tissue (log)         | $X^2_1 = 2.53$                                    | $P = 0.111$ | $X^2_1 = 2.89$  | $P = 0.088$ | $X^2_1 = 1.08$       | $P = 0.298$ |
| Number of pd in second hour (sqrt)                                                                    | $X^2_1 = 0.18$                                    | $P = 0.665$ | $X^2_1 = 0.50$  | $P = 0.479$ | $X^2_1 = 2.47$       | $P = 0.115$ |
| Number of pd in fifth hour (sqrt)                                                                     | $X^2_1 = 3.02$                                    | $P = 0.082$ | $X^2_1 = 1.08$  | $P = 0.296$ | $X^2_1 = 0.16$       | $P = 0.685$ |
| Number of pd in sixth hour (sqrt)                                                                     | $X^2_1 = 0.16$                                    | $p = 0.684$ | $X^2_1 = 2.35$  | $p = 0.125$ | $X^2_1 = 1.25$       | $p = 0.261$ |
| Total duration of all pd's (sqrt)                                                                     | $X^2_1 = 0.11$                                    | $p = 0.739$ | $X^2_1 = 0.21$  | $p = 0.646$ | $X^2_1 = 1.95$       | $p = 0.162$ |
| Mean duration of each pd in third hour (not transformed)                                              | $X^2_1 = 1.29$                                    | $P = 0.255$ | $X^2_1 = 1.50$  | $P = 0.219$ | $X^2_1 = 0.64$       | $P = 0.420$ |
| Mean duration of each pd in fourth hour (not transformed)                                             | $X^2_1 = 0.03$                                    | $P = 0.860$ | $X^2_1 = 0.04$  | $P = 0.832$ | $X^2_1 = 1.44$       | $P = 0.228$ |
| Mean duration of each pd in fifth hour (not transformed)                                              | $X^2_1 = 0.34$                                    | $p = 0.554$ | $X^2_1 = 2.97$  | $p = 0.084$ | $X^2_1 = 0.01$       | $p = 0.999$ |
| Total duration of pd sub-phase 1 (not transformed)                                                    | $X^2_1 = 3.25$                                    | $P = 0.071$ | $X^2_1 = 0.50$  | $P = 0.477$ | $X^2_1 = 0.55$       | $P = 0.457$ |
| Total duration of pd sub-phase 2 (sqrt)                                                               | $X^2_1 = 2.65$                                    | $P = 0.103$ | $X^2_1 = 0.131$ | $P = 0.717$ | $X^2_1 = 0.143$      | $P = 0.705$ |
| Total duration of pd sub-phase 3 (sqrt)                                                               | $X^2_1 = 2.11$                                    | $P = 0.145$ | $X^2_1 = 0.90$  | $P = 0.342$ | $X^2_1 = 0.98$       | $P = 0.321$ |
| Number of xylem ingestion phases (not transformed)                                                    | $X^2_1 = 0.30$                                    | $p = 0.577$ | $X^2_1 = 0.01$  | $p = 0.982$ | $X^2_1 = 3.02$       | $p = 0.081$ |
| Number of (phloem) E phases which only contain E1                                                     | $X^2_1 = 1.55$                                    | $P = 0.212$ | $X^2_1 = 0.01$  | $P = 0.899$ | $X^2_1 = 0.95$       | $P = 0.328$ |
| Total duration of all E phases which only contain E1 (salivation into phloem)                         | $X^2_1 = 0.15$                                    | $P = 0.697$ | $X^2_1 = 0.17$  | $P = 0.679$ | $X^2_1 = 1.47$       | $P = 0.224$ |
| Combined duration of E1 (sqrt)                                                                        | $X^2_1 = 0.03$                                    | $p = 0.852$ | $X^2_1 = 0.25$  | $p = 0.611$ | $X^2_1 = 0.21$       | $p = 0.639$ |
| Mean duration of each E1 phase (log)                                                                  | $X^2_1 = 0.78$                                    | $p = 0.375$ | $X^2_1 = 0.01$  | $p = 0.899$ | $X^2_1 = 0.01$       | $p = 0.981$ |
| Mean duration of E1 phase when followed by E2 (phloem ingestion) phase (log)                          | $X^2_1 = 0.39$                                    | $p = 0.530$ | $X^2_1 = 0.01$  | $p = 0.946$ | $X^2_1 = 0.05$       | $p = 0.806$ |
| Mean duration of E1 phase when followed by sE2 (sustained phloem ingestion) phase (log)               | $X^2_1 = 0.02$                                    | $p = 0.867$ | $X^2_1 = 0.04$  | $p = 0.823$ | $X^2_1 = 0.33$       | $p = 0.561$ |
| Total duration of all E1 phases before first E2 (log)                                                 | $X^2_1 = 0.59$                                    | $p = 0.442$ | $X^2_1 = 0.137$ | $p = 0.710$ | $X^2_1 = 1.56$       | $p = 0.221$ |
| Total duration of all E1 phases before first sE2 (sqrt)                                               | $X^2_1 = 0.76$                                    | $p = 0.383$ | $X^2_1 = 0.115$ | $p = 0.734$ | $X^2_1 = 0.01$       | $p = 0.992$ |
| Duration of first E phase (log)                                                                       | $X^2_1 = 0.01$                                    | $p = 0.899$ | $X^2_1 = 0.34$  | $p = 0.554$ | $X^2_1 = 3.19$       | $p = 0.073$ |
| Duration of first E2 phase (log)                                                                      | $X^2_1 = 0.12$                                    | $p = 0.722$ | $X^2_1 = 0.01$  | $p = 0.889$ | $X^2_1 = 1.09$       | $p = 0.295$ |
| Mean duration of each E2 phase (sqrt)                                                                 | $X^2_1 = 0.01$                                    | $P = 0.979$ | $X^2_1 = 0.01$  | $P = 0.984$ | $X^2_1 = 1.80$       | $P = 0.178$ |
| Percentage of probe spent in C phase (not transformed)                                                | $X^2_1 = 0.15$                                    | $p = 0.689$ | $X^2_1 = 0.38$  | $p = 0.537$ | $X^2_1 = 3.15$       | $p = 0.075$ |
| Percentage of probe spent in E1 phase (sqrt)                                                          | $X^2_1 = 0.19$                                    | $p = 0.661$ | $X^2_1 = 0.27$  | $p = 0.597$ | $X^2_1 = 0.98$       | $p = 0.320$ |

|                                                    |                |             |                |             |                 |             |
|----------------------------------------------------|----------------|-------------|----------------|-------------|-----------------|-------------|
| Percentage of probe spent in E2 phase              | $X^2_1 = 0.90$ | $P = 0.340$ | $X^2_1 = 0.44$ | $P = 0.503$ | $X^2_1 = 1.22$  | $P = 0.268$ |
| Percentage of probe spent in xylem phase           | $X^2_1 = 1.37$ | $P = 0.241$ | $X^2_1 = 0.41$ | $P = 0.517$ | $X^2_1 = 0.78$  | $P = 0.376$ |
| Total duration of all E phases (sqrt)              | $X^2_1 = 1.15$ | $P = 0.283$ | $X^2_1 = 0.06$ | $P = 0.792$ | $X^2_1 = 1.84$  | $P = 0.174$ |
| Total time spent ingesting xylem (sqrt)            | $X^2_1 = 1.17$ | $P = 0.278$ | $X^2_1 = 1.31$ | $P = 0.252$ | $X^2_1 = 1.14$  | $P = 0.283$ |
| Mean duration of each xylem ingestion phase (sqrt) | $X^2_1 = 1.24$ | $P = 0.265$ | $X^2_1 = 0.20$ | $P = 0.652$ | $X^2_1 = 0.341$ | $P = 0.559$ |

Feeding and probing parameter abbreviations: np (non-probing), C (stylet penetration/pathway phase), pd (potential-drop/intercellular punctures), the pd sub-phases (pd-II1, pd-II2, pd-II3), E1e (extracellular saliva secretion), E1 (saliva secretion into phloem) E2 (saliva secretion and passive phloem ingestion), F (penetration difficulty) or G (xylem ingestion).

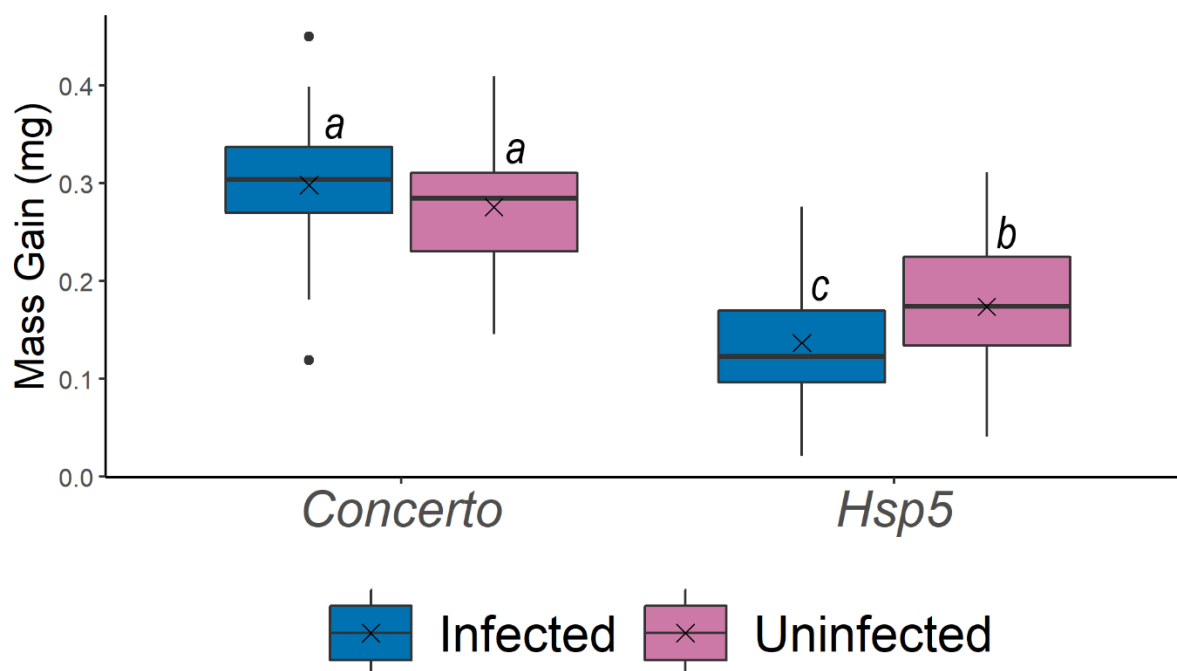

**Fig. S1:** Juvenile *R. padi* mass gain over a 96 h period in the presence (infected) and absence (uninfected) of *Hamiltonella defensa* infection on Concerto and Hsp5. Box plots indicate the median as a thick line, the interquartile range (IQR) as a box, 1.5 IQR as whiskers and the outliers as points outside the whisker range. Infected reports the combined data for both *H. defensa*-infected lines (DL 16/04; DL 16/05) and Uninfected reports the combined data for both *H. defensa*-uninfected lines (DL 16/06; DL 16/13). Letters indicate which groups are similar to each other using Least Squares Means *post-hoc* analysis. The black cross (“x”) on each plot shows the mean value. The number of replicates for each experimental group was 14 and comprised two experimental blocks, each containing seven replicates. Each replicate was taken from a unique aphid and represents a single biological replicate. See methods for details of the statistical analysis.
